# Supplementary material for: Synonymous but not silent: Functional codon bias reveals decoupled mitonuclear evolution in parasitic worms
Source: Research Square preprint supplement (doi:10.21203/rs.3.rs-7502964/v1), 2025-09-03
Supplement: Supplementary file 2 [file b3f9de0ab1647463e543dbe4.docx]

**Table 1. Effective Number of Codons (ENc) values for mitochondrial and nuclear-encoded transcriptomes across parasitic helminth orders.** Mean ENc values (± SD) are shown for mitochondrial genomes and matched nuclear transcriptomes of 120 species spanning 11 taxonomic orders. Lower ENc values indicate stronger codon-usage bias, while higher values reflect weaker bias and greater neutrality. Cyclophyllidea and Rhabditida display pronounced codon bias (low ENc), whereas Diphyllobothriidea exhibit relaxed constraints. Comparative values across compartments highlight both conserved and lineage-specific forces shaping synonymous codon evolution in helminths.

| Order | Mitochondria Genome ENCs Value | Transcriptome ENCs Value |
| --- | --- | --- |
| Strigeidida | 36.40280991735537±5.656355308137991 | 46.213106397181015±7.5330582198640785 |
| Mermithida | 34.410714285714285±2.7396419313640075 | 50.50973437241577±9.33447024469404 |
| Gyrodactylidea | 50.66416666666667±3.8302135196435994 | 53.32084533540944±7.616187893937954 |
| Opisthorchiida | 41.71194444444445±3.5287479118515717 | 57.37346619496892±4.073220038636823 |
| Diphyllobothriidea | 40.04666666666667±3.6164315482056537 | 53.712267933944204±8.48885068685592 |
| Tricladida | 30.55333333333333±2.7216650429581897 | 49.11744954402764±5.190184334569098 |
| Rhabditida | 33.34308261405672±5.441264751020424 | 48.396265494818536±11.713298595434395 |
| Macrostomida | 38.926923076923075±5.490462009423531 | 45.85202701324122±7.3111929647258425 |
| Plagiorchiida | 36.501666666666665±6.758349661037454 | 55.44200227667507±6.951894760108581 |
| Cyclophyllidea | 35.64730769230769±4.4112441879088715 | 55.046232539923686±6.492872566537529 |
| Trichinellida | 38.76863905325443±6.976619622072341 | 51.513081266714096±8.586641166897758 |
