# Supplementary material for: Synonymous but not silent: Functional codon bias reveals decoupled mitonuclear evolution in parasitic worms
Source: Research Square preprint supplement (doi:10.21203/rs.3.rs-7502964/v1), 2025-09-03
Supplement: Supplementary file 3 [file d3d81baa64c3960cd5b3e5fa.docx]

**Table 2. Codon Adaptation Index (CAI) values for mitochondrial protein-coding genes across parasitic helminth orders.** Mean CAI values are shown for 13 canonical mitochondrial genes (ATP6, ATP8, COX1–3, COB, NAD1–6, NAD4L) calculated across 120 species grouped by 11 taxonomic orders. Higher CAI values (e.g., COX1, COX2) indicate stronger codon optimization consistent with translational selection, while lower values (e.g., ATP8, NAD4L) reflect relaxed constraints. Lineage-specific variation underscores differential selective pressures shaping mitochondrial gene expression among helminths.

| Order | ATP6 | ATP8 | COX1 | COX2 | COX3 | COB | NAD1 | NAD2 | NAD3 | NAD4 | NAD4L | NAD5 | NAD6 |
| --- | --- | --- | --- | --- | --- | --- | --- | --- | --- | --- | --- | --- | --- |
| Cyclophyllidea | 0.191 | 0 | 0.192 | 0.271 | 0.213 | 0.226 | 0.207 | 0.228 | 0.222 | 0.186 | 0.176 | 0.192 | 0.193 |
| Diphyllobothriidea | 0.193 | 0 | 0.181 | 0.224 | 0.177 | 0.199 | 0.182 | 0.181 | 0.195 | 0.177 | 0.148 | 0.172 | 0.186 |
| Gyrodactylidea | 0.116 | 0 | 0.143 | 0.138 | 0.13 | 0.133 | 0.134 | 0.21 | 0.163 | 0.098 | 0.082 | 0.121 | 0.101 |
| Macrostomida | 0.174 | 0.215 | 0.131 | 0.143 | 0.149 | 0.171 | 0.192 | 0.158 | 0.182 | 0.192 | 0.118 | 0.127 | 0.17 |
| Mermithida | 0.096 | 0 | 0.095 | 0.112 | 0.084 | 0.1 | 0.085 | 0.092 | 0.129 | 0.086 | 0.098 | 0.1 | 0.094 |
| Opisthorchiida | 0.186 | 0 | 0.156 | 0.173 | 0.171 | 0.185 | 0.198 | 0.167 | 0.201 | 0.162 | 0.13 | 0.163 | 0.167 |
| Plagiorchiida | 0.184 | 0 | 0.208 | 0.247 | 0.231 | 0.199 | 0.217 | 0.21 | 0.234 | 0.202 | 0.201 | 0.191 | 0.253 |
| Rhabditida | 0.27 | 0 | 0.227 | 0.229 | 0.241 | 0.255 | 0.264 | 0.293 | 0.268 | 0.262 | 0.28 | 0.274 | 0.255 |
| Strigeidida | 0.192 | 0.142 | 0.173 | 0.168 | 0.169 | 0.166 | 0.16 | 0.155 | 0.189 | 0.159 | 0.181 | 0.176 | 0.189 |
| Trichinellida | 0.213 | 0.154 | 0.147 | 0.178 | 0.164 | 0.132 | 0.235 | 0.194 | 0.126 | 0.153 | 0.175 | 0.17 | 0.139 |
| Tricladida | 0.198 | 0 | 0.203 | 0.267 | 0.195 | 0.203 | 0.192 | 0.157 | 0.187 | 0.195 | 0.164 | 0.177 | 0.19 |
